# Supplementary material for: Y-box binding protein-1 is crucial in acquired drug resistance development in metastatic clear-cell renal cell carcinoma
Source: PubMed Central journal article supplement (PMC7011538; doi:10.1186/s13046-020-1527-y), 2020-02-10
Supplement: 13046_2020_1527_MOESM1_ESM.pdf [file 13046_2020_1527_MOESM1_ESM.pdf]

## **Additional File**

### **Y-box binding protein-1 is crucial in acquired drug resistance development in metastatic clear-cell renal cell carcinoma**

**Authors:** Ninadh M. D'Costa<sup>1,4</sup>, Matthew R. Lowerison<sup>2</sup>, Peter A. Raven<sup>1</sup>, Zheng Tan<sup>1</sup>, Morgan E. Roberts<sup>1,4</sup>, Raunak Shrestha<sup>1</sup>, Matthew W. Urban<sup>3</sup>, Cesar U. Monjaras-Avila<sup>1,4</sup>, Htoo Zarni Oo<sup>1,4</sup>, Antonio Hurtado-Coll<sup>1,4</sup>, Claudia Chavez-Munoz<sup>1,4</sup> and \*Alan I. So<sup>1,4</sup>.

#### **Affiliations:**

<sup>1</sup>Department of Urologic Sciences, Faculty of Medicine, University of British Columbia, Vancouver BC, Canada

<sup>2</sup>Department of Urology, Mayo Clinic College of Medicine and Science, Mayo Clinic, Rochester, MN, USA.

<sup>3</sup>Department of Radiology, Mayo Clinic, Rochester, MN, USA

<sup>4</sup>Vancouver Prostate Centre, 2660 Oak St. Vancouver BC V6H 3Z6, Canada.

**Running title:** YB-1/ABCB-1 in sunitinib-resistant kidney tumors

#### **\*Corresponding author:**

Dr. Alan I. So,

Department of Urologic Sciences, University of British Columbia,  
Level 6, 2775-Laurel St, Vancouver, BC, Canada, V5Z 1M9,

Email: dralanso@mail.ubc.ca

Tel: +1- 604-875-5603

Fax: +1- 604-875-5604

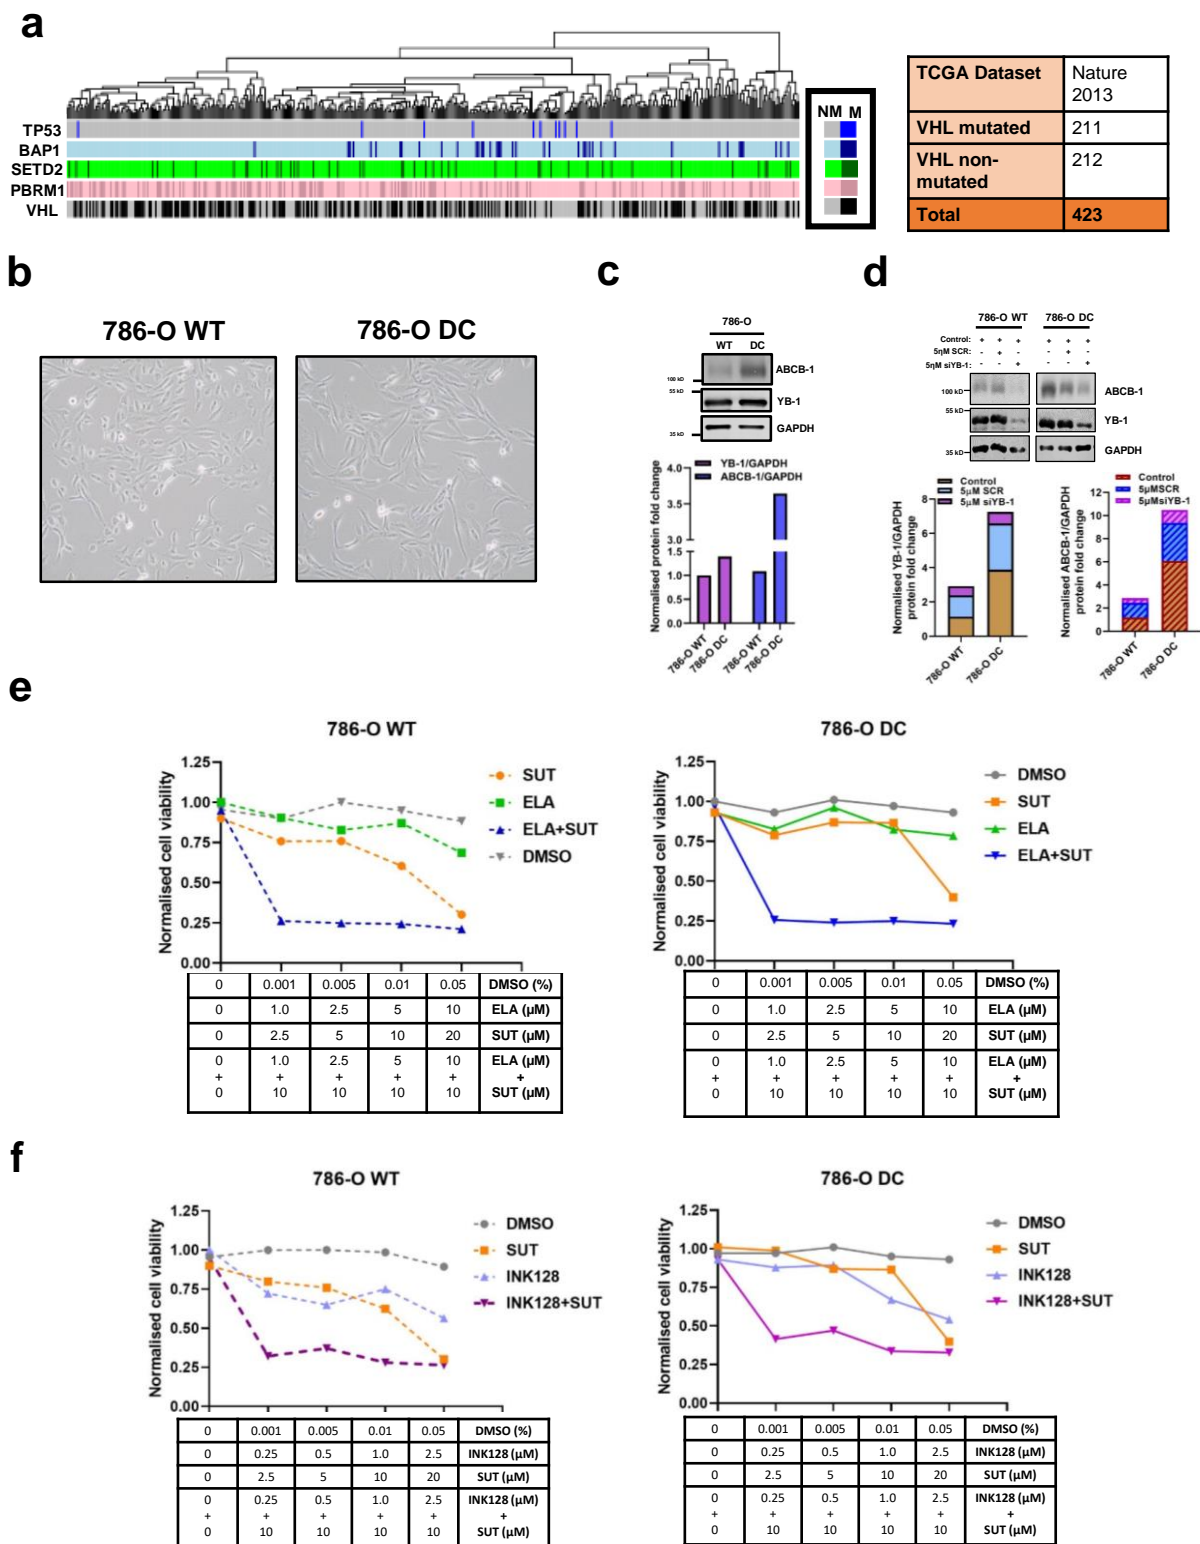

Figure 1

**Additional File. Figure 1: VHL mutated cell-line 786-O also develop acquired sunitinib-resistance by YB-1/ABCB-1 pathway.** a) Gene mutation data from TCGA KIRC dataset showing 212 ccRCC patients are VHL mutated and 211 non-mutated (total ccRCC patient = 423, shown in the table), b) morphological changes observed in 786-O WT and DC, c) YB-1 and ABCB-1 protein levels in 786-O WT and DC, d) knocking down YB-1 with siYB-1 also decreased ABCB-1 protein level, e) treatment response of 786-O WT and DC to ABCB-1 blocker, elacridar, with/without sunitinib, and f) with mTOR inhibitor, INK128. SUT: sunitinib, ELA: elacridar, SCR: esiEGFP, siYB-1: esiYB1.

| Gene   | Accession# | Name                                        | Peptide# | Log<br>FC_80<br>mg/kg | t        | Score    | p-value  | FDR      |
|--------|------------|---------------------------------------------|----------|-----------------------|----------|----------|----------|----------|
| ABCB1  | P08183     | Multidrug resistance protein-1              | 26       | -0.45323              | -2.29642 | 0.053957 | 4.10E-11 | 9.55E-09 |
| ABCB10 | Q9NRK6     | ATP-bonding cassette sub-family B member 10 | 5        | 0.267708              | 1.8302   | 0.108369 | 0.010748 | 0.152629 |
| ABCC4  | O15439     | Multidrug resistance-associated protein 4   | 12       | 0.473752              | 2.73992  | 0.027898 | 6.12E-08 | 7.98E-06 |
| ABCD1  | P33897     | ATP-bonding cassette sub-family D member 1  | 6        | -0.30498              | -1.41874 | 0.197421 | 0.042111 | 0.34299  |
| ABCD3  | P28288     | ATP-bonding cassette sub-family D member 3  | 12       | -0.22344              | -1.26589 | 0.244637 | 0.02586  | 0.262226 |
| ABCE1  | P61221     | ATP-bonding cassette sub-family E member 1  | 16       | 0.195736              | 1.60078  | 0.151901 | 0.000465 | 0.016489 |
| ABCF2  | Q9UG63     | ATP-bonding cassette sub-family F member 2  | 20       | 0.23689               | 1.651535 | 0.14105  | 5.74E-05 | 0.003047 |

**Additional File. Figure 2: Proteome data analysis.** Tumors from sunitinib-sensitive and resistant rodents were analysed for difference in protein expression pattern. Significant upregulation of ATP-binding cassette transporter proteins were observed in sunitinib-resistant tumors compared to the sensitive tumors. ABCB-1 was the most markedly upregulated among other transporters from the same family of proteins. Individual p-values were calculated using Student's t-test, n=3 animals/group.

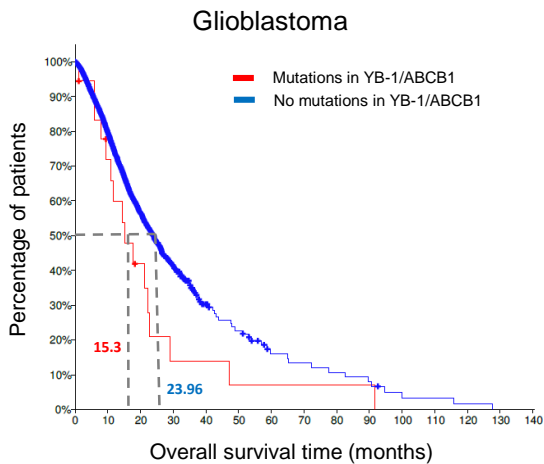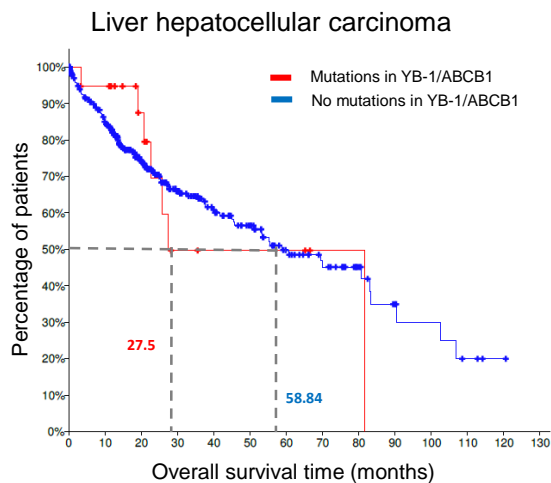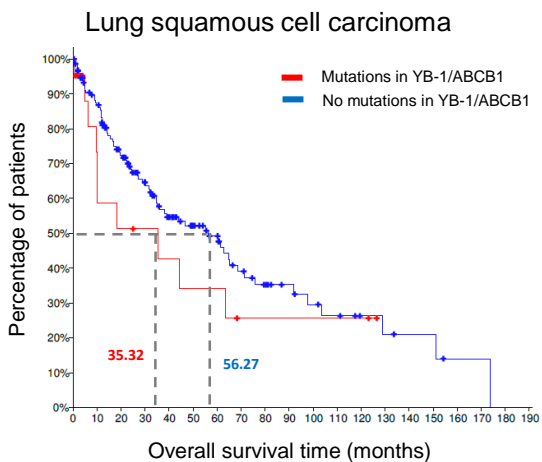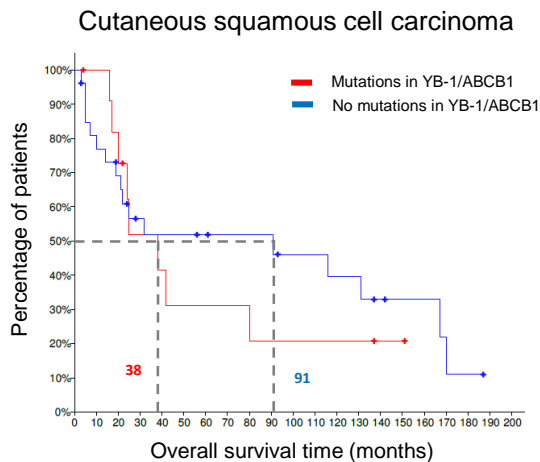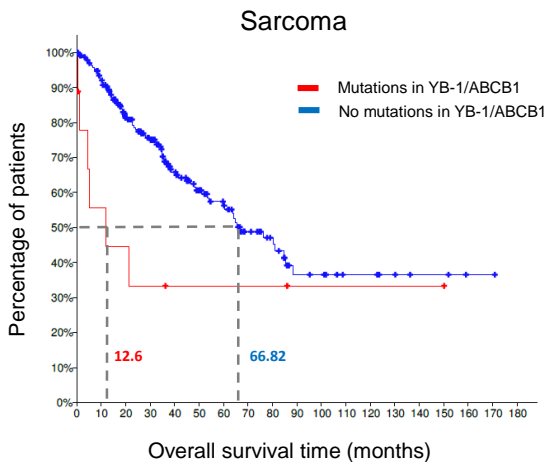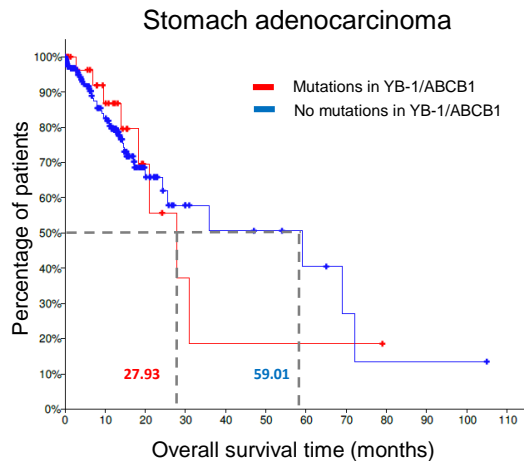

**Figure 3**

***Additional File. Figure 3: Mutation of YBX1 and ABCB1 gene in other types of cancer and the overall survival in patients.*** To investigate the relevance of YBX1/ABCB1 pathway in other cancer types, we analyzed patient data from TCGA cBioPortal for overall survival in patients. As shown in the Kaplan-Meier curves, drastic decrease in survival time is observed in glioblastoma, hepatocellular carcinoma, lung squamous cell carcinoma, cutaneous squamous cell carcinoma, sarcoma and stomach adenocarcinoma patients when tumors had mutation in YBX1 and ABCB1 genes (red) compared to the tumors with no mutation (blue).
